# Supplementary material for: Dietary Green Pea Protects against DSS-Induced Colitis in Mice Challenged with High-Fat Diet
Source: MDPI journal article supplement (doi:10.3390/nu9050509), 2017-05-18
Supplement: s1 [file s1]

**Supplementary Materials: Dietary green pea protects against DSS-induced colitis in mice challenged with high-fat diet**

Shima Bibi, Luís Fernando de Sousa Moraes, Noelle Lebow, and Mei-Jun Zhu

**Figure S1.** An overview of experimental design. Six-week-old female mice were either fed HFD (45% energy from fat) or HFD supplemented with 10% GP (HFDGP) until necropsy. After the 7-week of dietary treatment, mice (13-weeks-old) in both groups were subjected to 2.5% DSS water for 7-days followed by a 7-days of recovery using normal water.

**Dietary and DSS treatment**

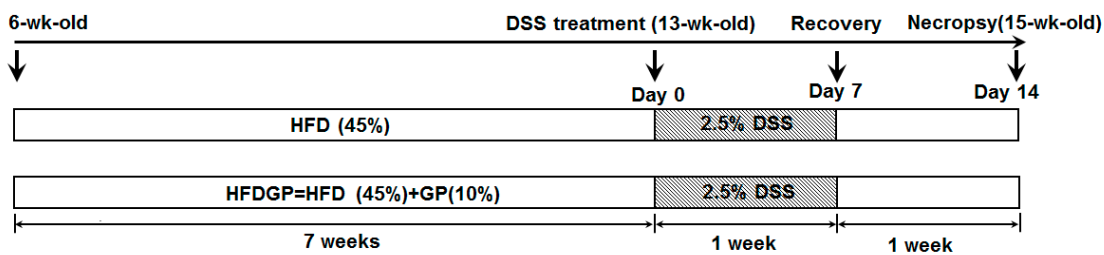

**Figure S2.** Feed intake (A), and body weight (B) of HFD (□) or HFDGP (■) fed mice before DSS-induction. Means  $\pm$  SEM, n = 7.

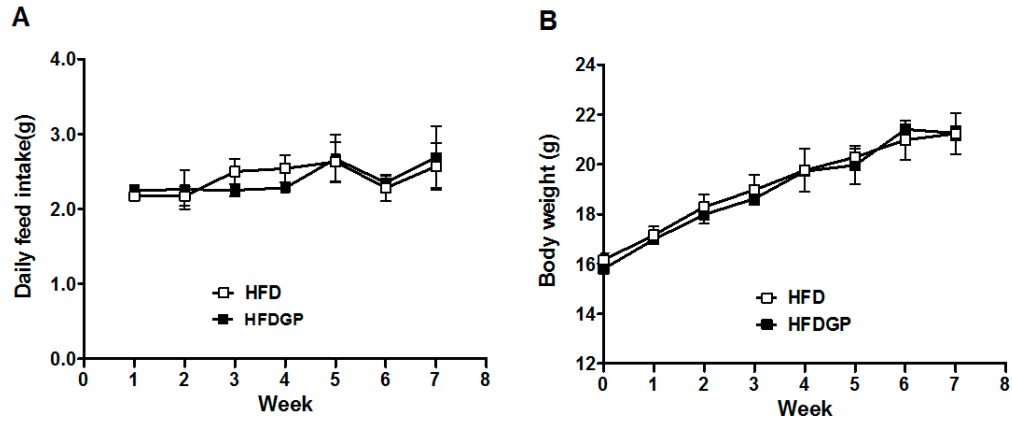

**Table S1 Composition of the experimental diets<sup>1</sup>**

| Diet                                               | 45% HFD (D12451) |       | HFDGP <sup>3</sup> (D15080605) |       |
|----------------------------------------------------|------------------|-------|--------------------------------|-------|
|                                                    | gm%              | Kcal% | gm%                            | Kcal% |
| Protein                                            | 24               | 20    | 24                             | 20    |
| Carbohydrates                                      | 41               | 35    | 41                             | 35    |
| Fat                                                | 24               | 45    | 24                             | 45    |
| Total                                              |                  | 100   |                                | 100   |
| Kcal/gm                                            | 4.7              |       | 4.7                            |       |
| Ingredient                                         | gm               | kcal  | gm                             | kcal  |
| Casein, 30 Mesh                                    | 200              | 800   | 179.58                         | 718   |
| L-Cystine                                          | 3                | 12    | 3                              | 12    |
| <b>Green Pea Powder (Protein)<sup>2</sup></b>      | 0                | 0     | <b>20.42</b>                   | 82    |
| Corn Starch                                        | 72.8             | 291   | 7.42                           | 30    |
| Maltodextrin 10                                    | 100              | 400   | 100                            | 400   |
| Sucrose                                            | 172.8            | 691   | 172.8                          | 691   |
| <b>Green Pea Powder (Carbohydrate)<sup>2</sup></b> | 0                | 0     | <b>65.38</b>                   | 262   |
| Cellulose, BW200                                   | 50               | 0     | 50                             | 0     |
| Soybean Oil                                        | 25               | 225   | 25                             | 225   |
| Lard                                               | 177.5            | 1598  | 177.5                          | 1598  |
| Mineral Mix S10026                                 | 10               | 0     | 10                             | 0     |
| DiCalcium Phosphate                                | 13               | 0     | 13                             | 0     |
| Calcium Carbonate                                  | 5.5              | 0     | 5.5                            | 0     |
| Potassium Citrate, 1 H <sub>2</sub> O              | 16.5             | 0     | 16.5                           | 0     |
| Vitamin Mix V10001                                 | 10               | 40    | 10                             | 40    |
| Choline Bitartrate                                 | 2                | 0     | 2                              | 0     |
| FD&C red dye 40                                    | 0.05             | 0     | 0                              | 0     |
| FD&C blue dye 1                                    | 0                | 0     | 0.005                          | 0     |
| Total                                              | 858.15           | 4057  | 585.105                        | 4057  |

<sup>1</sup>Diets were purchased from Research Diets Inc. (New Brunswick, NJ, USA) and information of diet composition was provided by the company.

<sup>2</sup>Green Pea Powder contains 23.8% protein and 76.2% carbohydrates, of 25% dietary fiber. which were adjusted accordingly.

<sup>3</sup>Per USDA National Nutrient database, the mature split green pea contains 25.5% dietary fiber.

**Table S2.** Primer sequences for quantitative reverse transcription PCR

| Gene Name     | Accession No.  | Product Size | Direction | Sequence (5'-3')          | Source     |
|---------------|----------------|--------------|-----------|---------------------------|------------|
| CHOP          | NM_007837.4    | 97bp         | Forward   | TCTTGAGCCTAACACGTCGAT     | This study |
|               |                |              | Reverse   | TGGAACACTCTCTCCTCAGGT     |            |
| COX-2         | NM_011198.3    | 169bp        | Forward   | AGCCAGGCAGCAAATCCTT       | [1]        |
|               |                |              | Reverse   | GGGTGGGCTTCAGCAGTAAT      |            |
| Edem1         | NM_138677.2    | 114bp        | Forward   | GGCATGTTTCGTCTTCGGCTA     | This study |
|               |                |              | Reverse   | CAGATTGGAAGGGTCTCCGC      |            |
| Grp78         | NM_022310.3    | 272bp        | Forward   | TTCGTGTCTCCTCCTGACCC      | This study |
|               |                |              | Reverse   | GAACACACCGACGCAGGAA       |            |
| IFN- $\gamma$ | NM_008337.3    | 93 bp        | Forward   | AGGTCCAGCGCCAAGCATTCAA    | [2]        |
|               |                |              | Reverse   | AGCAGCGACTCCTTTTCCGCTT    |            |
| IL-6          | M20572         | 141bp        | Forward   | GAGGATACCACTCCCAACAGACC   | [3]        |
|               |                |              | Reverse   | AAGTGCATCATCGTTGTTTCATACA |            |
| IL-17A        | NM_010552.3    | 142bp        | Forward   | GCTCCAGAAGGCCCTCAGA       | [3]        |
|               |                |              | Reverse   | AGCTTTCCTCCGCATTGA        |            |
| iNOS          | U43428         | 95 bp        | Forward   | CAGCTGGGCTGTACAAACCTT     | [3]        |
|               |                |              | Reverse   | CATTGGAAGTGAAGCGTTTCG     |            |
| Klf4          | NM_010637.3    | 75 bp        | Forward   | CAGGATTCCATCCCCATCCG      | [4]        |
|               |                |              | Reverse   | GAGAGGGGACTTGTGACTGC      |            |
| MCP-1         | NM_011333.3    | 117bp        | Forward   | CACTCACCTGCTGCTACTCA      | This study |
|               |                |              | Reverse   | GCTTGGTGACAAAACTACAGC     |            |
| MUC-2         | NM_023566.2    | 101bp        | Forward   | ATGCCACCTCCTCAAAGAC       | This study |
|               |                |              | Reverse   | GTAGTTTCCGTTGGAACAGTGAA   |            |
| Spdef1        | NM_013891.4    | 280bp        | Forward   | CTTGTTCATGGTGCCAGCAG      | This study |
|               |                |              | Reverse   | TTGGGGCTGCTTCCGTTA        |            |
| Tff3          | NM_011575.2    | 103bp        | Forward   | CTGTCACATCGGAGCAGTGT      | This study |
|               |                |              | Reverse   | AATGTGCATTCTGTCTCCTGC     |            |
| Xbp1          | NM_001271730.1 | 118bp        | Forward   | TACGGGAGAAAACTCACGGC      | This study |
|               |                |              | Reverse   | CTTACTCCACTCCCCTTGGC      |            |
| 18S rRNA      | NR_003278.1    | 122bp        | Forward   | AAGACGGACCAGAGCGAAAG      | This study |
|               |                |              | Reverse   | ATCGCCAGTCGGCATCGTTT      |            |

## References

1. Kang, Y.; Xue, Y.; Du, M.; Zhu, M.J. Preventive effects of goji berry on dextran-sulfate-sodium-induced colitis in mice. *J Nutr Biochem* **2016**, *40*, 70-76.
2. Wang, H.; Xue, Y.; Zhang, H.; Huang, Y.; Yang, G.; Du, M.; Zhu, M.J. Dietary grape seed extract ameliorates symptoms of inflammatory bowel disease in il10-deficient mice. *Mol Nutr Food Res* **2013**, *57*, 2253-2257.

3. Giuliatti, A.; Overbergh, L.; Valckx, D.; Decallonne, B.; Bouillon, R.; Mathieu, C. An overview of real-time quantitative pcr: Applications to quantify cytokine gene expression. *Methods (San Diego, Calif.)* **2001**, *25*, 386-401.
4. Yang, G.; Xue, Y.; Zhang, H.; Du, M.; Zhu, M.J. Favourable effects of grape seed extract on intestinal epithelial differentiation and barrier function in il10-deficient mice. *Br J Nutr* **2015**, *114*, 15-23.
